# Supplementary material for: Highly efficient and thermally stable broadband NIR phosphors by rationally bridging Cr3+–Yb3+ in LiScGe2O6 for optical bioimaging
Source: Royal Society of Chemistry journal article supplement (doi:10.1039/d2qi02201j), 2022-12-09
Supplement: d2qi02201j1.pdf [file d2qi02201j1.pdf]

## Supporting Information

### **High-efficient and thermal-stable broadband NIR phosphor by rationally bridging Cr<sup>3+</sup>-Yb<sup>3+</sup> in LiScGe<sub>2</sub>O<sub>6</sub> for optical bioimaging**

Chuanlong Wang<sup>a</sup>, Yahong Jin<sup>a,\*</sup>, Lifang Yuan<sup>b</sup>, Bo Wang<sup>c</sup>, Ruiting Zhang<sup>a</sup>, Haoyi Wu<sup>a</sup>, Qing Yao<sup>a</sup>, and Yihua Hu<sup>a,\*</sup>

<sup>a</sup>School of Physics and Optoelectronic Engineering, Guangdong University of Technology, WaiHuan Xi Road, No. 100, Guangzhou 510006, P. R. China

<sup>b</sup>School of Electronics and Communications, Guangdong Mechanical & Electrical College of Technology, Guangzhou 510515, P. R. China

<sup>c</sup>School of Applied Physics and Materials, Wuyi University, Jiangmen 529020, P. R. China

\*Corresponding authors

E-mail: yhj@gdut.edu.cn; huyh@gdut.edu.cn

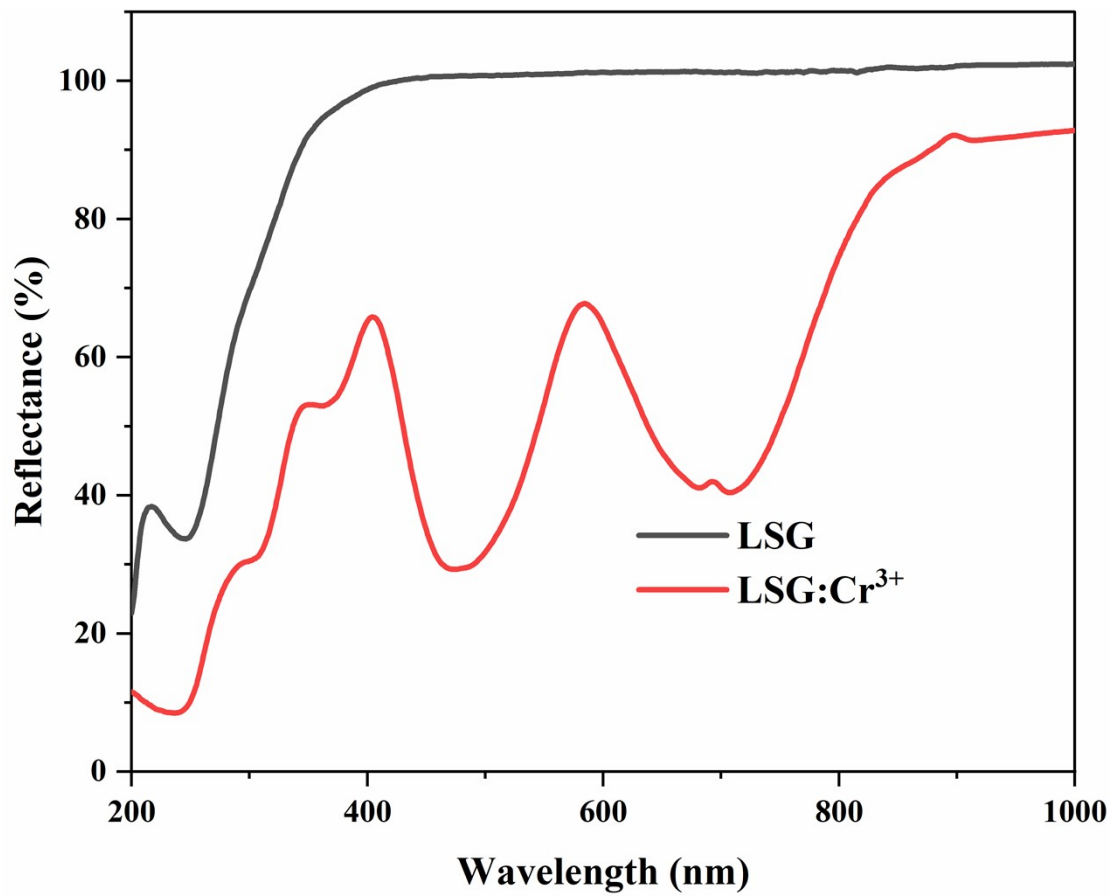

Fig. S1. DRS of LSG host and LSG:0.07Cr<sup>3+</sup>.

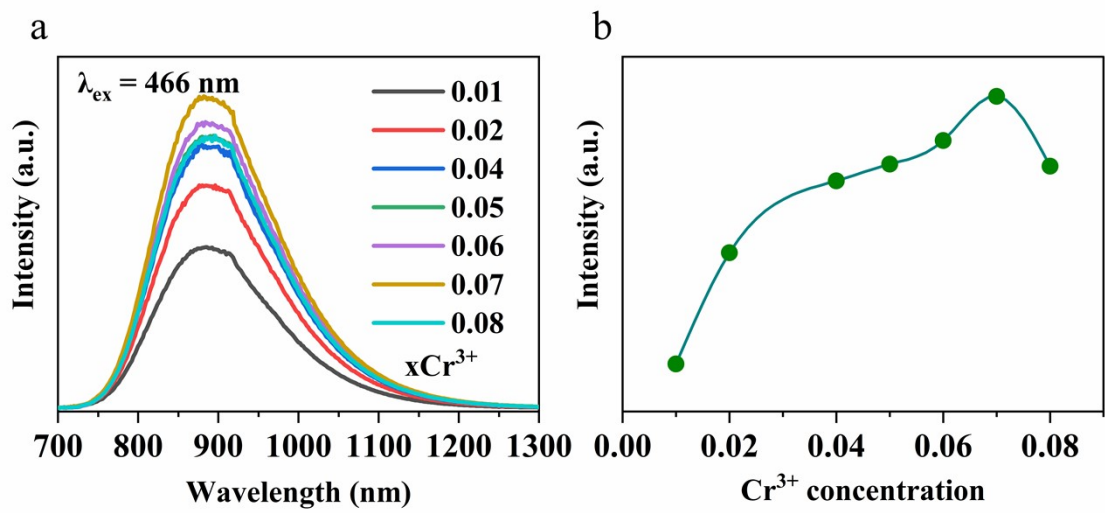

**Fig. S2.** (a) PL spectra of LSG:xCr<sup>3+</sup> (x = 0.01-0.08). (b) Emission intensities of Cr<sup>3+</sup> as a function of Cr<sup>3+</sup> doping concentration.

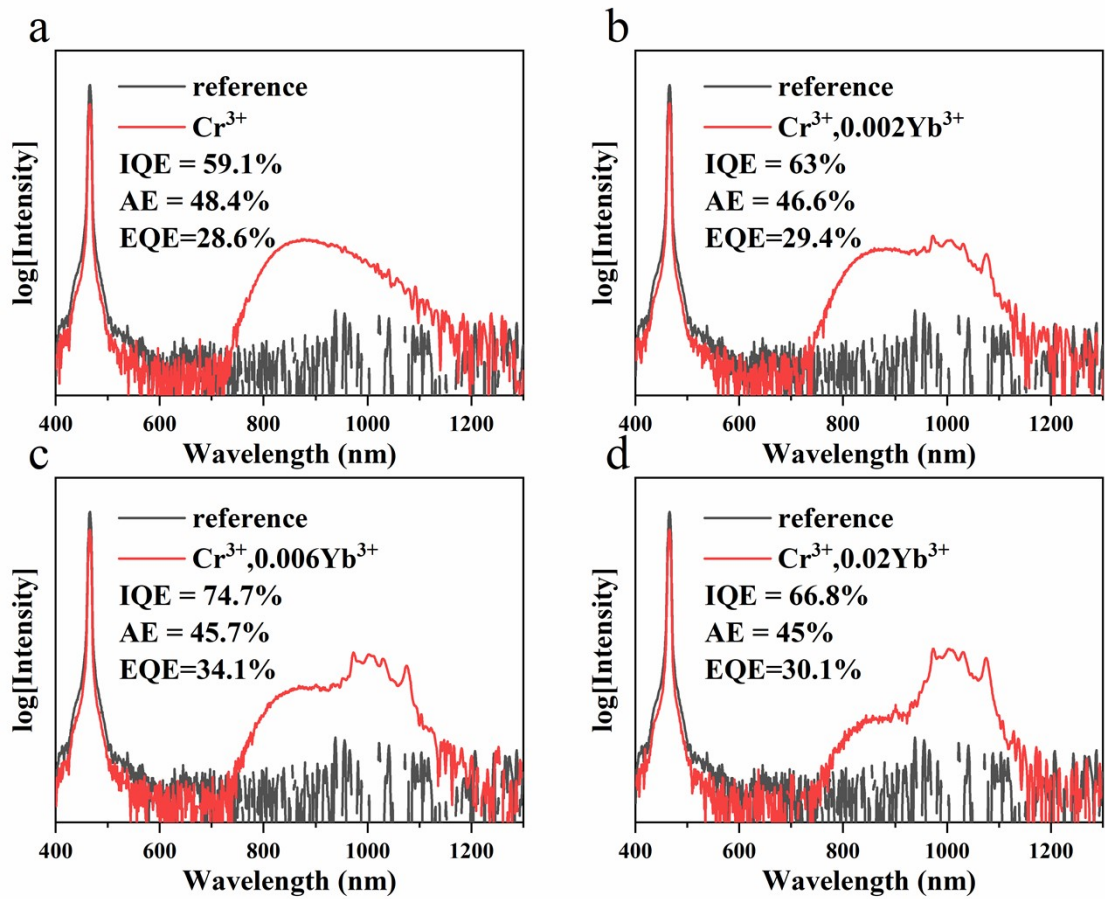

Fig. S3. IQE, AE and EQE of LSG:0.07Cr<sup>3+</sup>, yYb<sup>3+</sup> (y = 0, 0.002, 0.006, and 0.02).

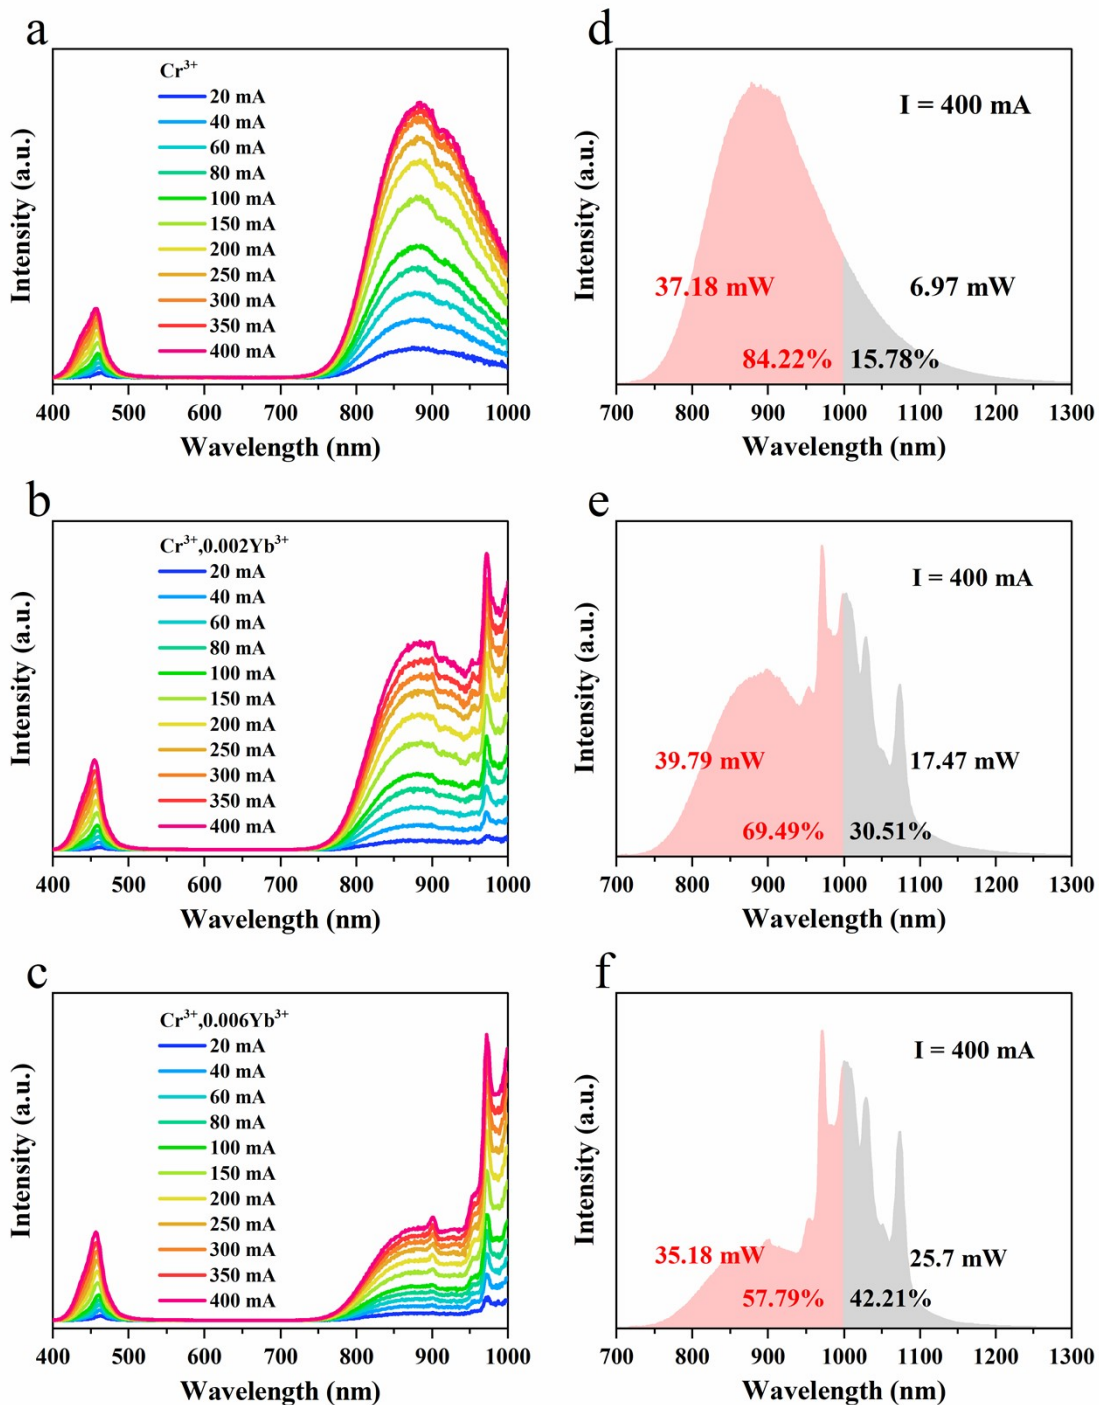

**Fig. S4.** (a-c) The electroluminescence spectra of the as-obtained NIR pc-LED based on LSG:0.07Cr<sup>3+</sup>, yYb<sup>3+</sup> (y = 0, 0.002, 0.006) at various driven currents. (d-f) The corresponding NIR output power at 400 mA based on PL spectra of LSG:0.07Cr<sup>3+</sup>, yYb<sup>3+</sup> (y = 0, 0.002, and 0.006). The integrated emission intensity ratios of 700-1000 nm and 1000-1300 nm of the as-obtained NIR pc-LED based on LSG:0.07Cr<sup>3+</sup>, yYb<sup>3+</sup> (y = 0,

0.002, and 0.006) are calculated to be 84.22:15.78, 69.49:30.51 and 57.79:42.21, respectively.

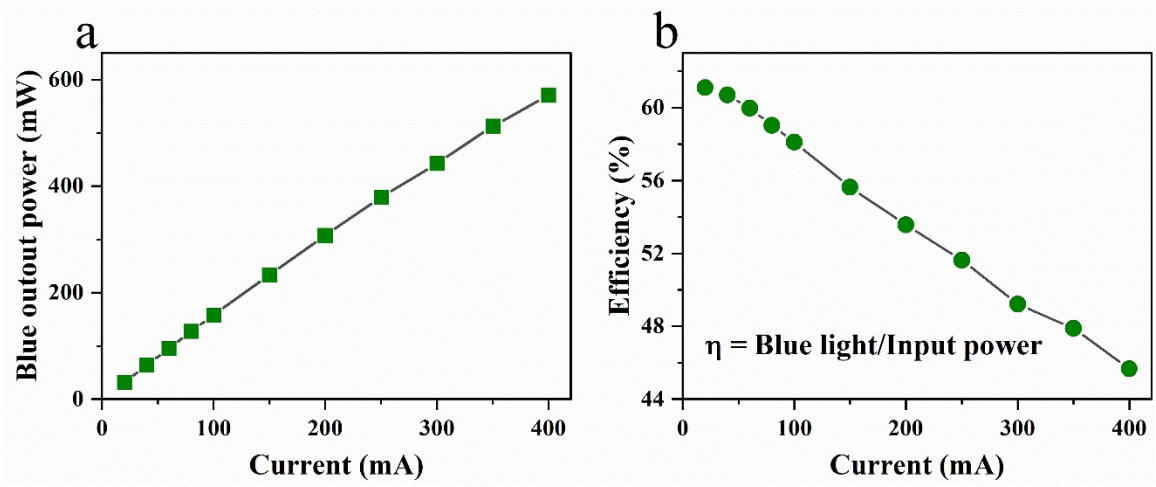

**Fig. S5.** (a) Output power of the 460 nm blue LED chip at different input currents. (b) Photoelectric conversion efficiency of the 460 nm LED chip as a function of driven current.

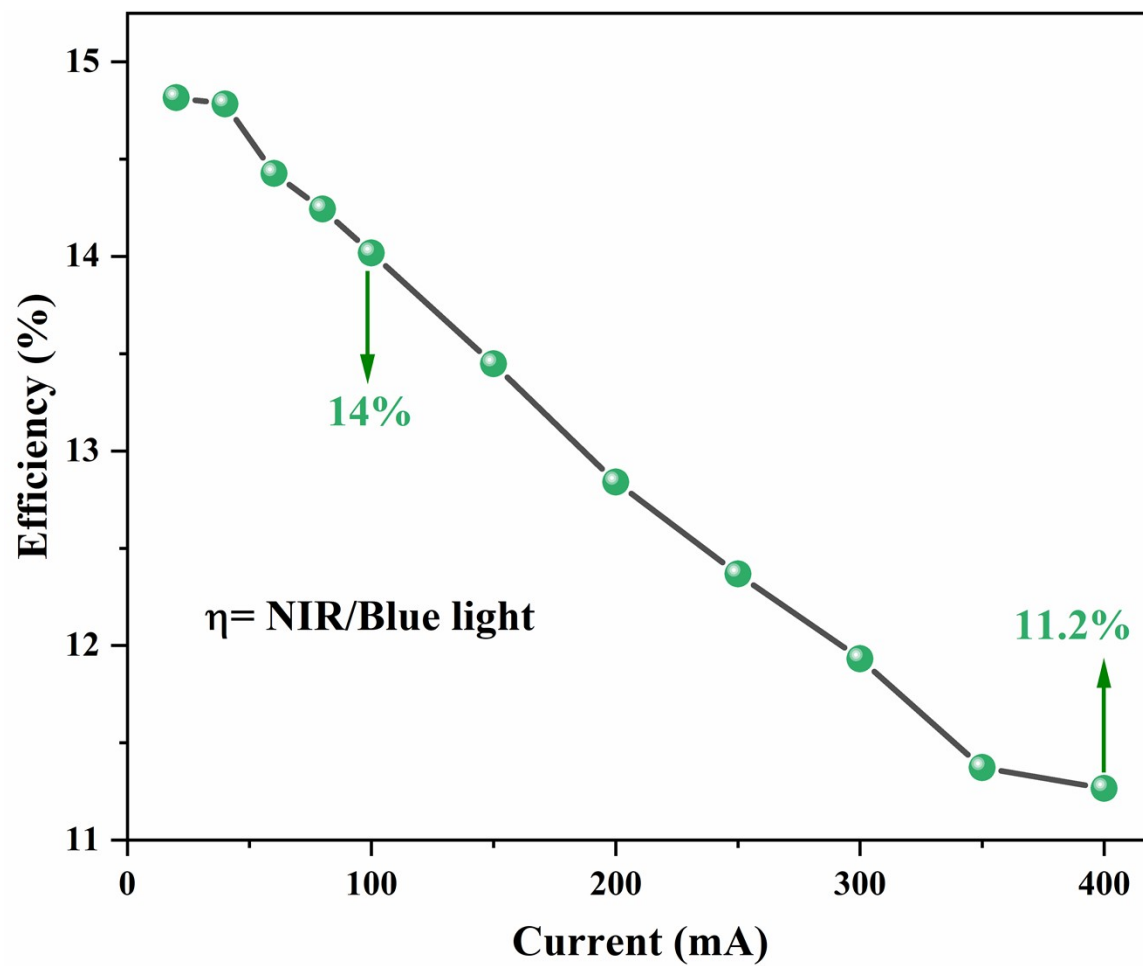

Fig. S6. The conversion efficiency of Blue to NIR light as a function of driven current.

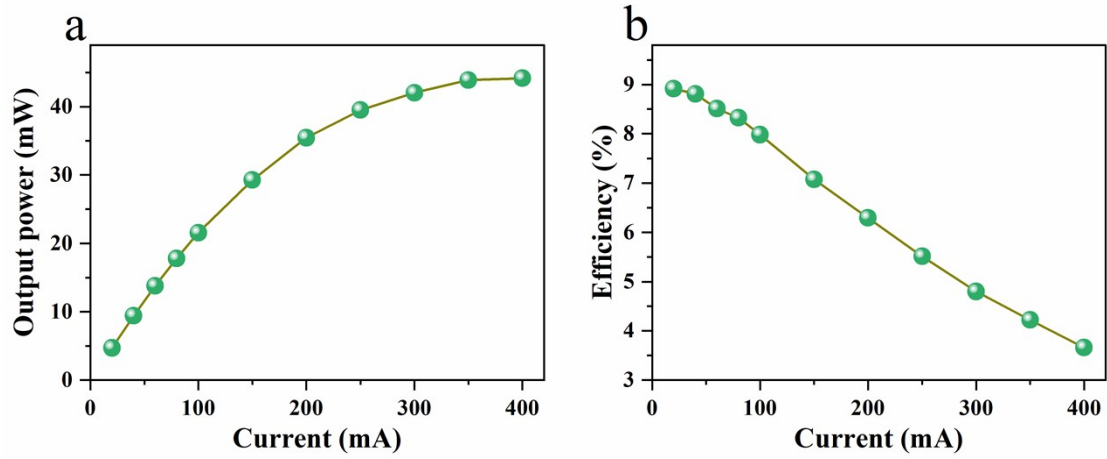

**Fig. S7.** (a) NIR output power and (b) photoelectric conversion efficiency of the fabricated pc-LED (by using LSG:0.07Cr<sup>3+</sup> phosphor) as a function of driven current.



**Table S1.** IQE, EQE, thermal stability (using the percentage of remaining emission intensity at 100 °C (or 150 °C) of the room-temperature value as a measure), and photoelectric parameters of some previously reported Cr<sup>3+</sup>-activated and Cr<sup>3+</sup>-Yb<sup>3+</sup> co-activated phosphors with emission peak exceeding 830 nm.

| Phosphor                                                                                                  | Peak position<br>(nm) | IQE<br>(%) | EQE<br>(%) | I <sub>100°C</sub> (or I <sub>150°C</sub> )<br>(%) | NIR output power |                  | Ref.         |
|-----------------------------------------------------------------------------------------------------------|-----------------------|------------|------------|----------------------------------------------------|------------------|------------------|--------------|
|                                                                                                           |                       |            |            |                                                    | (mW)@current     | (mA)@ efficiency |              |
| LiScGeO <sub>4</sub> :Cr <sup>3+</sup>                                                                    | 1120                  | 26         | -          | 30 <sub>100</sub>                                  | 4.78@60@4.4%     |                  | 1            |
| LiIn <sub>2</sub> SbO <sub>6</sub> :Cr <sup>3+</sup>                                                      | 970                   | 7          | 3.44       | 10 <sub>100</sub>                                  | -                |                  | 2            |
| CaSc <sub>0.85</sub> Al <sub>1.15</sub> SiO <sub>6</sub> :Cr <sup>3+</sup>                                | 950                   | 30         | 9.3        | 77 <sub>100</sub>                                  | -                |                  | 3            |
| Mg <sub>2</sub> GeO <sub>4</sub> :Cr <sup>3+</sup>                                                        | 940                   | 48.19      | 16.38      | -                                                  | -                |                  | 4            |
| NaInGe <sub>2</sub> O <sub>6</sub> :Cr <sup>3+</sup>                                                      | 900                   | 34         | -          | 55 <sub>100</sub>                                  | 25.2@120@4.5%    |                  | 5            |
| NaScGe <sub>2</sub> O <sub>6</sub> :Cr <sup>3+</sup>                                                      | 895                   | 40.22      | -          | 20 <sub>150</sub>                                  | 12.07@350@-      |                  | 6            |
| LiScP <sub>2</sub> O <sub>7</sub> :Cr <sup>3+</sup>                                                       | 880                   | 38         | 20         | 42 <sub>100</sub>                                  | 19@100@7%        |                  | 7            |
| LiInGe <sub>2</sub> O <sub>6</sub> :Cr <sup>3+</sup>                                                      | 880                   | 81.2       | 39.8       | 45 <sub>100</sub>                                  | -                |                  | 8            |
| Y <sub>0.57</sub> La <sub>0.72</sub> Sc <sub>2.71</sub> (BO <sub>3</sub> ) <sub>4</sub> :Cr <sup>3+</sup> | 850                   | 41.1       | -          | 42 <sub>100</sub>                                  | 17.61@300@-      |                  | 9            |
| Sr <sub>9</sub> Ga <sub>0.2</sub> (PO <sub>4</sub> ) <sub>7</sub> :0.8Cr <sup>3+</sup>                    | 850                   | 66.3       | 29.9       | -                                                  | 19.79@150@4.23   |                  | 10           |
| Ga <sub>4</sub> GeO <sub>8</sub> :Cr <sup>3+</sup>                                                        | 850                   | 60         | 27         | 73 <sub>100</sub>                                  | 55.94@400@3.8%   |                  | 11           |
| La(Sc, Ga) <sub>3</sub> B <sub>4</sub> O <sub>12</sub> :Cr <sup>3+</sup>                                  | 850                   | 52.12      | -          | 55 <sub>150</sub>                                  | -                |                  | 12           |
| LiGaP <sub>2</sub> O <sub>7</sub> :Cr <sup>3+</sup>                                                       | 846                   | 47.8       | 28.3       | 51 <sub>100</sub>                                  | 28.1@120@7.8%    |                  | 13           |
| BaZrGe <sub>3</sub> O <sub>9</sub> :Cr <sup>3+</sup>                                                      | 830                   | -          | -          | 53 <sub>150</sub>                                  | 6.45@320@0.6%    |                  | 14           |
| Ca <sub>4</sub> ZrGe <sub>3</sub> O <sub>12</sub> :Cr <sup>3+</sup> , Yb <sup>3+</sup>                    | 840, 968              | 25.5       | -          | 73 <sub>100</sub>                                  | -                |                  | 15           |
| LiInP <sub>2</sub> O <sub>7</sub> :Cr <sup>3+</sup> , Yb <sup>3+</sup>                                    | 860, 1000             | 27.5       | 10.8       | 50 <sub>100</sub>                                  | 6.24@100@2.2%    |                  | 16           |
| LiIn <sub>2</sub> SbO <sub>6</sub> :Cr <sup>3+</sup> , Yb <sup>3+</sup>                                   | 973                   | 10         | 4.76       | 30 <sub>100</sub>                                  | 2.74@180@-       |                  | 2            |
| LSG:Cr <sup>3+</sup> , Yb <sup>3+</sup>                                                                   | 880, 980              | 76.3       | 36.2       | 86 <sub>100</sub>                                  | 22.19@100@8.22%  |                  | This<br>work |
|                                                                                                           |                       |            |            |                                                    | 31.43@150@7.59%  |                  |              |
|                                                                                                           |                       |            |            |                                                    | 52.86@300@6.02%  |                  |              |
|                                                                                                           |                       |            |            |                                                    | 64.26@400@5.32%  |                  |              |

**Table S2.** Photoelectric parameters of the fabricated NIR pc-LED with LSG:0.07Cr<sup>3+</sup> under various currents.

| Current<br>(mA) | Input electrical power<br>(mW) | NIR output power (mW)<br>(700-1000 nm) | NIR output power (mW)<br>(700-1300 nm) | Photoelectric conversion<br>efficiency (%) |
|-----------------|--------------------------------|----------------------------------------|----------------------------------------|--------------------------------------------|
| 20              | 51.32                          | 3.85                                   | 4.57                                   | 8.91                                       |
| 40              | 104.3                          | 7.74                                   | 9.19                                   | 8.81                                       |
| 60              | 158.4                          | 11.35                                  | 13.48                                  | 8.51                                       |
| 80              | 213.7                          | 14.98                                  | 17.78                                  | 8.32                                       |
| 100             | 269.8                          | 18.14                                  | 21.53                                  | 7.98                                       |
| 150             | 414                            | 24.67                                  | 29.29                                  | 7.05                                       |
| 200             | 563.2                          | 29.86                                  | 35.45                                  | 6.29                                       |
| 250             | 716.3                          | 33.26                                  | 39.49                                  | 5.51                                       |
| 300             | 876.3                          | 35.41                                  | 42.04                                  | 4.79                                       |
| 350             | 1040                           | 36.97                                  | 43.89                                  | 4.22                                       |
| 400             | 1208                           | 37.19                                  | 44.15                                  | 3.65                                       |

**Table S3.** Photoelectric parameters of the fabricated NIR pc-LED with LSG:0.07Cr<sup>3+</sup>, 0.002Yb<sup>3+</sup> under various currents.

| Current<br>(mA) | Input electrical power<br>(mW) | NIR output power (mW)<br>(700-1000 nm) | NIR output power (mW)<br>(700-1300 nm) | Photoelectric conversion<br>efficiency (%) |
|-----------------|--------------------------------|----------------------------------------|----------------------------------------|--------------------------------------------|
| 20              | 51.19                          | 3.12                                   | 4.48                                   | 8.76                                       |
| 40              | 104.1                          | 6.32                                   | 9.09                                   | 8.73                                       |
| 60              | 158.2                          | 9.30                                   | 13.78                                  | 8.46                                       |
| 80              | 213.4                          | 12.17                                  | 17.51                                  | 8.20                                       |
| 100             | 269.4                          | 14.88                                  | 21.41                                  | 7.94                                       |
| 150             | 413.4                          | 20.95                                  | 30.14                                  | 7.29                                       |
| 200             | 562.4                          | 26.28                                  | 37.81                                  | 6.72                                       |
| 250             | 716.4                          | 30.88                                  | 44.43                                  | 6.20                                       |
| 300             | 874.9                          | 34.09                                  | 49.05                                  | 5.60                                       |
| 350             | 1038                           | 37.33                                  | 53.71                                  | 5.17                                       |
| 400             | 1206                           | 39.80                                  | 57.27                                  | 4.74                                       |

**Table S4.** Photoelectric parameters of the fabricated NIR pc-LED with LSG:0.07Cr<sup>3+</sup>, 0.006Yb<sup>3+</sup> under various currents.

| Current<br>(mA) | Input electrical power<br>(mW) | NIR output power (mW)<br>(700-1000 nm) | NIR output power (mW)<br>(700-1300 nm) | Photoelectric conversion<br>efficiency (%) |
|-----------------|--------------------------------|----------------------------------------|----------------------------------------|--------------------------------------------|
| 20              | 51.19                          | 2.66                                   | 4.60                                   | 8.99                                       |
| 40              | 104.1                          | 5.37                                   | 9.30                                   | 8.83                                       |
| 60              | 158.3                          | 7.94                                   | 13.74                                  | 8.68                                       |
| 80              | 213.4                          | 10.39                                  | 17.98                                  | 8.42                                       |
| 100             | 269.6                          | 12.67                                  | 21.92                                  | 8.13                                       |
| 150             | 413.6                          | 18.00                                  | 31.15                                  | 7.53                                       |
| 200             | 562.6                          | 22.37                                  | 38.71                                  | 6.88                                       |
| 250             | 716.5                          | 26.34                                  | 45.58                                  | 6.36                                       |
| 300             | 876                            | 29.48                                  | 51.01                                  | 5.82                                       |
| 350             | 1038                           | 33.4                                   | 57.80                                  | 5.56                                       |
| 400             | 1207                           | 35.19                                  | 60.89                                  | 5.04                                       |

**Table S5.** Photoelectric parameters of the fabricated NIR pc-LED with LSG:0.07Cr<sup>3+</sup>, 0.01Yb<sup>3+</sup> under various currents.

| Current<br>(mA) | Input electrical power<br>(mW) | NIR output power (mW)<br>(700-1000 nm) | NIR output power (mW)<br>(700-1300 nm) | Photoelectric conversion<br>efficiency (%) |
|-----------------|--------------------------------|----------------------------------------|----------------------------------------|--------------------------------------------|
| 20              | 51.22                          | 2.34                                   | 4.64                                   | 9.06                                       |
| 40              | 104.2                          | 4.73                                   | 9.39                                   | 9.01                                       |
| 60              | 158.5                          | 6.94                                   | 13.78                                  | 8.69                                       |
| 80              | 213.6                          | 9.11                                   | 18.10                                  | 8.47                                       |
| 100             | 269.8                          | 11.17                                  | 22.19                                  | 8.22                                       |
| 150             | 414.6                          | 15.82                                  | 31.43                                  | 7.59                                       |
| 200             | 563.4                          | 19.87                                  | 39.47                                  | 7.01                                       |
| 250             | 718.4                          | 23.59                                  | 46.86                                  | 6.53                                       |
| 300             | 877.2                          | 26.61                                  | 52.86                                  | 6.02                                       |
| 350             | 1041                           | 29.37                                  | 58.34                                  | 5.60                                       |
| 400             | 1209                           | 32.35                                  | 64.26                                  | 5.32                                       |

## References

- 1 S. Miao, Y. Liang, Y. Zhang, D. Chen and X. Wang, Broadband short-wave infrared light-emitting diodes based on Cr<sup>3+</sup>-doped LiScGeO<sub>4</sub> phosphor, *ACS Appl. Mater. Inter.*, 2021, **13**, 36011-36019.
- 2 G. Liu, T. Hu, M. S. Molokeev and Z. Xia, Li/Na substitution and Yb<sup>3+</sup> co-doping enabling tunable near-infrared emission in LiIn<sub>2</sub>SbO<sub>6</sub>:Cr<sup>3+</sup> phosphors for light-emitting diodes, *iScience*, 2021, **24**, 102250.
- 3 G. Liu, M. S. Molokeev and Z. Xia, Structural rigidity control toward Cr<sup>3+</sup>-based broadband near-infrared luminescence with enhanced thermal stability, *Chem. Mater.*, 2022, **34**, 1376-1384.
- 4 H. Cai, S. Liu, Z. Song and Q. Liu, Tuning luminescence from NIR-I to NIR-II in Cr<sup>3+</sup>-doped olivine phosphors for nondestructive analysis, *J. Mater. Chem. C*, 2021, **9**, 5469-5477.
- 5 W. Zhou, J. Luo, J. Fan, H. Pan, S. Zeng, L. Zhou, Q. Pang and X. Zhang, Luminescent properties and LED application of broadband near-infrared emitting NaInGe<sub>2</sub>O<sub>6</sub>: Cr<sup>3+</sup> phosphors, *Ceram. Int.*, 2021, **47**, 25343-25349.
- 6 X. Zhou, W. Geng, J. Li, Y. Wang, J. Ding and Y. Wang, An ultraviolet-visible and near-infrared-responded broadband NIR phosphor and its NIR spectroscopy application, *Adv. Opt. Mater.*, 2020, **8**, 1902003.
- 7 L. Yao, Q. Shao, S. Han, C. Liang, J. He and J. Jiang, Enhancing near-infrared photoluminescence intensity and spectral properties in Yb<sup>3+</sup> codoped LiScP<sub>2</sub>O<sub>7</sub>:Cr<sup>3+</sup>, *Chem. Mater.*, 2020, **32**, 2430-2439.
- 8 T. Liu, H. Cai, N. Mao, Z. Song and Q. Liu, Efficient near-infrared pyroxene phosphor LiInGe<sub>2</sub>O<sub>6</sub>:Cr<sup>3+</sup> for NIR spectroscopy application, *J. Am. Ceram. Soc.*, 2021, **104**, 4577-4584.
- 9 H. Wu, L. Jiang, K. Li, C. Li and H. Zhang, Design of broadband near-infrared Y<sub>0.57</sub>La<sub>0.72</sub>Sc<sub>2.71</sub>(BO<sub>3</sub>)<sub>4</sub>:Cr<sup>3+</sup> phosphors based on one-site occupation and their application in NIR light-emitting diodes, *J. Mater. Chem. C*, 2021, **9**, 11761-11771.
- 10 F. Zhao, H. Cai, Z. Song and Q. Liu, Structural confinement for Cr<sup>3+</sup> activators toward efficient Near-Infrared phosphors with suppressed concentration quenching, *Chem. Mater.*, 2021, **33**, 3621-3630.
- 11 L. Yao, Q. Shao, M. Shi, T. Shang, Y. Dong, C. Liang, J. He and J. Jiang, Efficient ultra-broadband Ga<sub>4</sub>GeO<sub>8</sub>:Cr<sup>3+</sup> phosphors with tunable peak wavelengths from 835 to 980 nm for NIR pc-LED application, *Adv. Opt. Mater.*, 2022, **10**, 2102229.
- 12 T. Gao, W. Zhuang, R. Liu, Y. Liu, C. Yan and X. Chen, Design of a broadband NIR phosphor for security-monitoring LEDs: Tunable photoluminescence properties and enhanced thermal stability, *Cryst. Growth Des.*, 2020, **20**, 3851-3860.
- 13 C. Yuan, R. Li, Y. Liu, L. Zhang, J. Zhang, G. Leniec, P. Sun, Z. Liu, Z. Luo, R. Dong and J. Jiang, Efficient and Broadband LiGaP<sub>2</sub>O<sub>7</sub>:Cr<sup>3+</sup> Phosphors for Smart Near-Infrared Light-Emitting Diodes, *Laser Photonics Rev.*, 2021, **15**, 2100227.

- 14 D.J. Hou, H. Lin, Y. Zhang, J. Li, H. Li, J. Dong, Z. Lin and R. Huang, A broadband near-infrared phosphor  $\text{BaZrGe}_3\text{O}_9:\text{Cr}^{3+}$ : luminescence and application for light-emitting diodes, *Inorg. Chem. Front.*, 2021, **8**, 2333-2340.
- 15 J. Xiang, J. Zheng, X. Zhao, X. Zhou, C. Chen, M. Jin and C. Guo, Synthesis of broadband NIR garnet phosphor  $\text{Ca}_4\text{ZrGe}_3\text{O}_{12}:\text{Cr}^{3+}, \text{Yb}^{3+}$  for NIR pc-LED applications, *Mater. Chem. Front.*, 2022, **6**, 440-449.
- 16 H. Zhang, J. Zhong, X. Zhang, H. Yang, Z. Mu and W. Zhao, Achieving an ultra-broadband infrared emission through efficient energy transfer in  $\text{LiInP}_2\text{O}_7:\text{Cr}^{3+}, \text{Yb}^{3+}$  phosphor, *J. Alloys Compd.*, 2022, **894**, 162386.
